# Supplementary material for: miR-4521-FAM129A axial regulation on ccRCC progression through TIMP-1/MMP2/MMP9 and MDM2/p53/Bcl2/Bax pathways
Source: PubMed Central journal article supplement (PMC6465337; doi:10.1038/s41420-019-0167-5), 2019-04-15
Supplement: 41420_2019_167_MOESM1_ESM.pdf [file 41420_2019_167_MOESM1_ESM.pdf]

# DECLARATION OF CONTRIBUTIONS TO ARTICLE

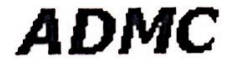

|                                                                                                                                                                  |                                                  |                      |
|------------------------------------------------------------------------------------------------------------------------------------------------------------------|--------------------------------------------------|----------------------|
| Manuscript Number:<br><b>CDDIS-19-0221</b>                                                                                                                       | Journal Name:<br><i>Cell Death &amp; Disease</i> | (the 'Journal')      |
| Proposed Title of the Contribution:<br>miR-4521-FAM129A axial regulation on ccRCC progression through TIMP-1/MMP2/MMP9 and MDM2/p53/Bcl2/Bax pathways            |                                                  | (the 'Contribution') |
| Author(s):<br>Xue Feng, Naimeng Yan, Weibin Sun, Shanliang Zheng, Sixiong Jiang, Jinxia Wang, Chunmei Guo, Lihong Hao, Yuxiang Tian, Shuqing Liu, Ming-Zhong Sun |                                                  | (the 'Authors')      |

For all *CDDis* articles, each person named as an author in the published version must be able to show he or she has contributed substantially to the article.

Authorship credit should be based on 1) substantial contributions to conception and design, acquisition of data, or analysis and interpretation of data; 2) drafting the article or revising it critically for important intellectual content; and 3) final approval of the version to be published. Authors should meet conditions 1, 2 and 3.

Any person who cannot be shown to have made a substantial contribution to the article cannot be listed as an author in the final version. The name of any person who is deemed to have made a minor contribution can, however, appear in the Acknowledgments section of the article.

Please complete the table below to indicate the contributions of all named authors to the manuscript.

| Author Full Name: | Specification of Contribution to the Manuscript:                                           |
|-------------------|--------------------------------------------------------------------------------------------|
| Xue Feng          | designed the work, performed the experiments , drafted the manuscript.                     |
| Naimeng Yan       | designed the work, performed the experiments , drafted the manuscript.                     |
| Weibin Sun        | designed the work and validated the clinical and pathological diagnosis of ccRCC patinets. |
| Shanliang Zheng   | carried out the date analysis and statistics.                                              |
| Sixiong Jiang     | collected and classified the tissues and specimens.                                        |
| Jinxia Wang       | carried out the date analysis and statistics.                                              |
| Chunmei Guo       | carried out the date analysis and statistics.                                              |
| Lihong Hao        | contributed in the IHC image processing and analysis.                                      |
| Yuxiang Tian      | collected and classified the tissues and specimens.                                        |
| Shuqing Liu       | designed the work, revised the manuscript and made the final approval of the submission.   |
| Ming-Zhong Sun    | designed the work, revised the manuscript and made the final approval of the submission.   |
|                   |                                                                                            |
|                   |                                                                                            |

Please complete the table below to indicate the contributions of all named authors to the figures.

Figure 1:

Xue Feng and Naimeng Yan designed the work and performed the experiments, Weibin Sun validated the clinical and pathological diagnosis of ccRCC patients, Sixiong Jiang and Yuxiang Tian collected and classified the tissues and specimens. Shuqing Liu and Ming-Zhong Sun designed the work and revised the manuscript.

Figure 2:

Xue Feng and Naimeng Yan designed the work and performed the experiments, Weibin Sun validated the clinical and pathological diagnosis of ccRCC patients, Sixiong Jiang and Yuxiang Tian collected and classified the tissues and specimens. Lihong Hao contributed in the IHC image processing and analysis. Shuqing Liu and Ming-Zhong Sun designed the work and revised the manuscript.

Figure 3:

Xue Feng and Naimeng Yan designed the work and performed the experiments, Shanliang Zheng, Jinxia Wang and Chunmei Guo carried out the data analysis and statistics. Shuqing Liu and Ming-Zhong Sun designed the work and revised the manuscript.

Figure 4:

Xue Feng and Naimeng Yan designed the work and performed the experiments, Shanliang Zheng, Jinxia Wang and Chunmei Guo carried out the data analysis and statistics. Shuqing Liu and Ming-Zhong Sun designed the work and revised the manuscript.

Figure 5:

Xue Feng and Naimeng Yan designed the work and performed the experiments, Shanliang Zheng, Jinxia Wang and Chunmei Guo carried out the data analysis and statistics. Shuqing Liu and Ming-Zhong Sun designed the work and revised the manuscript.

Figure 6:

Xue Feng and Naimeng Yan designed the work and performed the experiments, Shanliang Zheng, Jinxia Wang and Chunmei Guo carried out the data analysis and statistics. Shuqing Liu and Ming-Zhong Sun designed the work and revised the manuscript.

Signed for and on behalf of the Author(s):

Print Name:

Date:

*Mingzhong Sun*

Ming-Zhong Sun

2019-01-24
